# Supplementary material for: Organic templates promoted photocatalytic and photoluminescent properties between two coordination polymers
Source: Royal Society of Chemistry journal article supplement (doi:10.1039/c3ce41930d), 2013-01-01
Supplement: c3ce41930d.pdf [file c3ce41930d.pdf]

## Supporting Information

### Organic templates promoted photocatalytic and photoluminescent properties between two coordination polymers

Shu-Mei Chen,<sup>a,b,\*</sup> Yan-Fei Chen,<sup>a,b</sup> Rui Lin,<sup>a,b</sup> Xiao-Ping Lei,<sup>a,b</sup> and Jian Zhang<sup>b,\*</sup>

<sup>a</sup> College of Chemistry & Chemical Engineering, Fuzhou University, Fuzhou, Fujian 350108, China.

<sup>b</sup> State Key Laboratory of Structural Chemistry, Fujian Institute of Research on the Structure of Matter, the Chinese Academy of Sciences, Fuzhou, Fujian 350002, China. E-mail: [csm@fzu.edu.cn](mailto:csm@fzu.edu.cn)

[zhj@fjirsm.ac.cn](mailto:zhj@fjirsm.ac.cn)

**X-ray diffraction analysis.** Suitable single crystals of **1-2** were carefully selected under an optical microscope and glued to thin glass fibers. Whereafter, single-crystal X-ray diffraction analyses were performed on a computer-controlled XCalibur E CCD diffractometer with graphite monochromated Mo K $\alpha$  radiation ( $\lambda_{\text{Mo-K}\alpha}$  = 0.71073 Å) at T = 293 K. The structures were solved using the direct method and refined by full-matrix least-squares methods on  $F^2$  by using the SHELX-97 program package. The SQUEEZE option of PLATON was used to eliminate the contribution of disordered guest molecules to the reflection intensities. Due to the bad crystal quality of compound **2**, several atoms in the structure have large ADPs including O21 atom and the final R-factors are large.

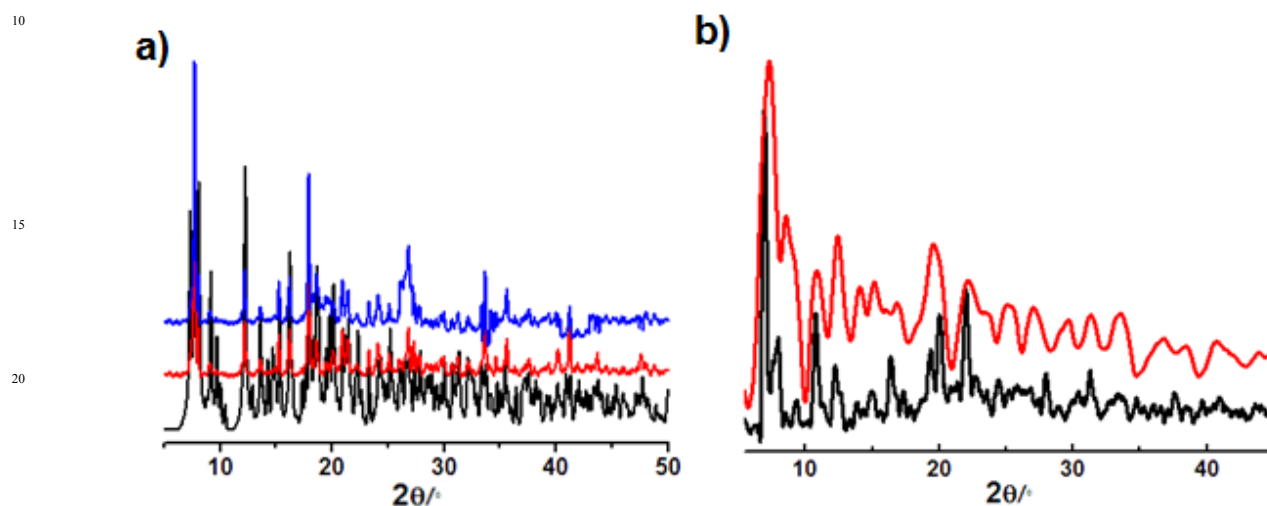

**Figure S1.** (a) Powder XRD patterns for **1**: Black line: simulated, Red line: sample, Blue line: after degradation of methyl blue; (b) Powder XRD patterns for **2**: Black line: simulated, Red line: sample.

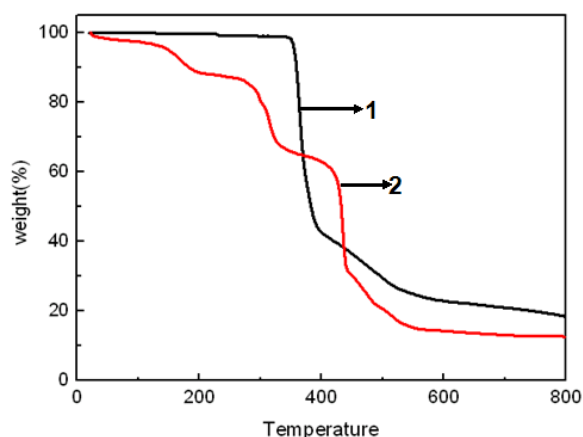

**Figure S2.** The TGA diagram of compound **1** and **2**.

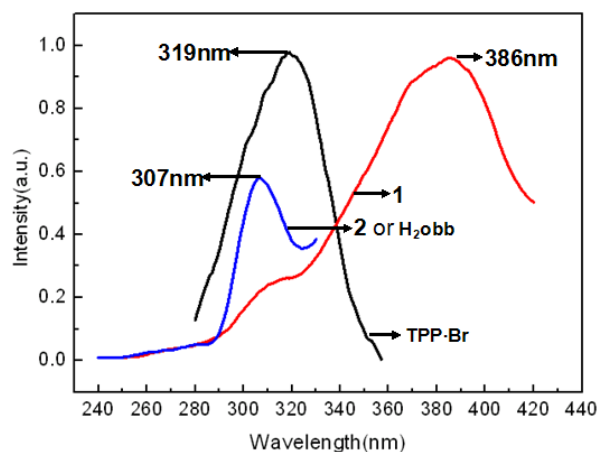

**Figure S3.** Excitation spectra of **1** ( maximum 386 nm), **2** or H<sub>2</sub>obb (maximum 307 nm) and TPP·Br (maximum 319 nm) in the solid state at room temperature.

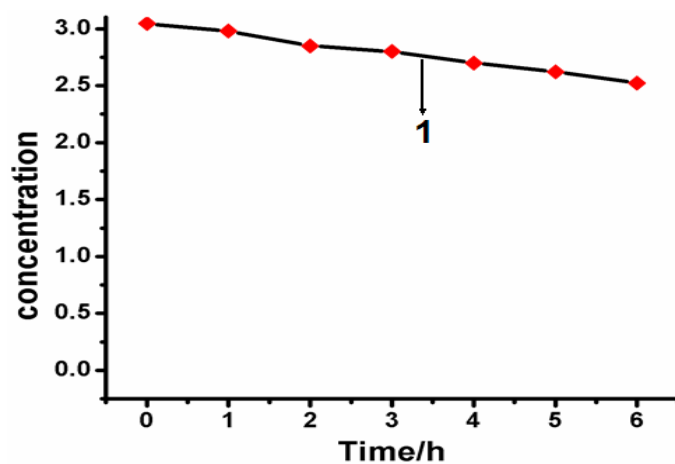

**Figure S4.** The darkcatalytic degradation curve of MB concentration corresponding to **1**.

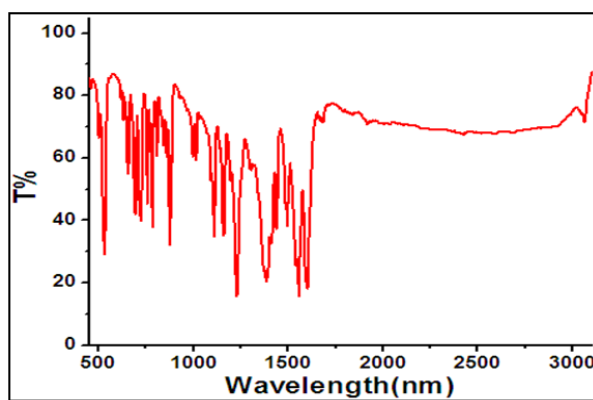

**Figure S5.** The IR of compound **1**.

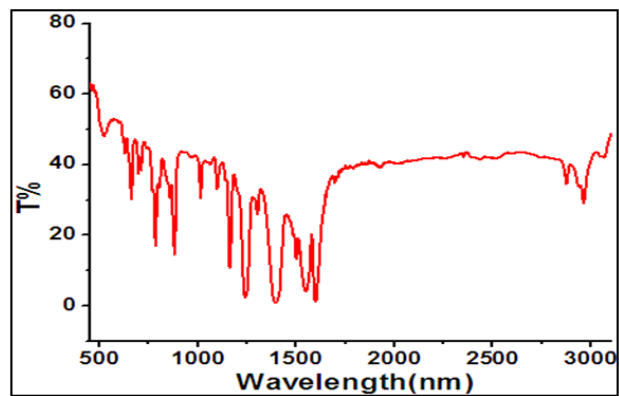

**Figure S6.** The IR of compound **2**.
